## **Unifying ecosystem resistance, resilience, and recovery from extreme stress into a single statistical**

### **2 framework**

4 Nathan P. Lemoine

Department of Biological Sciences

6 Marquette University

Milwaukee, WI 53233

8

Department of Zoology

10 Milwaukee Public Museum

Milwaukee, WI 53233

12

*email:* [nathan.lemoine@marquette.edu](mailto:nathan.lemoine@marquette.edu)

14

## Abstract

16 Natural communities and ecosystems are currently experiencing unprecedented rates of  
environmental and biotic change. While gradual shifts in average conditions, such as rising mean air  
18 temperatures, can significantly alter ecosystem function, ecologists recently acknowledged that the  
most damaging consequences of global change will probably emanate from both a higher prevalence  
20 and increased intensity of extreme climatic stress events. Given the potential ecological and societal  
ramifications of more frequent disturbances, it is imperative that we identify which ecosystems are  
22 most vulnerable to global change by accurately quantifying ecosystem responses to extreme stress.  
Unfortunately, the lack of a standardized method for estimating ecosystem sensitivity to drought makes  
24 drawing general conclusions difficult. There is a need for estimates of resistance/resilience/legacy  
effects that are free of observation error, not biased by stochasticity in production or rainfall, and  
26 standardizes stress magnitude among many disparate ecosystems relative to normal interannual  
variability. Here, I propose a statistical framework that estimates all three components of ecosystem  
28 response to stress using standardized language (resistance, resilience, recovery, and legacy effects)  
while resolving all of the issues described above. Coupling autoregressive time series with exogenous  
30 predictors (ARX) models with impulse response functions (IRFs) allows researchers to statistically  
subject all ecosystems to similar levels of stress, estimate legacy effects, and obtain a standardized  
32 estimate of ecosystem resistance and resilience to drought free from observation error and stochastic  
processes inherent in raw data. This method will enable researchers to rigorously compare resistance  
34 and resilience among locations using long-term time series, thereby improving our knowledge of  
ecosystem responses to extreme stress.

36

38

## Introduction

40 Natural communities and ecosystems are currently experiencing unprecedented rates of  
environmental and biotic change. While gradual shifts in average conditions, such as rising mean air  
42 temperatures, can significantly alter ecosystem function, ecologists recently acknowledged that the  
most damaging consequences of global change will probably emanate from both a higher prevalence  
44 and increased intensity of extreme climatic stress events, defined as climate events that occur outside  
the statistical bounds of historical conditions (Smith 2011). For example, more frequent and severe  
46 droughts in North America and Europe have already caused shifts in plant community composition,  
widespread tree mortality, and catastrophic declines in primary production (Ciais et al. 2005, Anderegg  
48 et al. 2013, Hoover et al. 2014, Knapp et al. 2015a). Concurrent with drought, the frequency and  
duration of heat waves have also increased over the past century (Perkins et al. 2012). In terrestrial  
50 systems, heat waves exacerbate drought water stress by increasing evapotranspiration, while marine  
heat waves cause extensive mortality of foundation species and habitat loss (Ciais et al. 2005, Le  
52 Nohaïc et al. 2017, Smale et al. 2019). Given the potential ecological and societal ramifications of more  
frequent disturbances, it is imperative that we identify which ecosystems are most vulnerable to global  
54 change by accurately quantifying ecosystem responses to extreme stress.

Ecosystem stress response consists of two components: the decline in ecosystem function  
56 during or immediately following the stress event, and the degree of improvement in ecosystem function  
after alleviation of stress (Lloret et al. 2011, Smith 2011). The magnitude of decline in ecosystem  
58 function during stress, often called ‘resistance’ or ‘sensitivity’ to stress, has been studied extensively  
and varies both among and within ecosystems (Huxman et al. 2004, Knapp et al. 2015, Sully et al.  
60 2019). Grasslands, for instance, are typically more drought-sensitive than forests because grasslands  
occupy drier climate conditions (Stuart-Haëntjens et al. 2018). Indeed, arid and semi-arid grasslands  
62 are among the most drought-sensitive ecosystems on the planet, losing up to twice as much primary

production, proportionally, than mesic grasslands during drought (Knapp et al. 2015a). In marine  
64 ecosystems, coral reef resistance to bleaching also depends on local climate conditions. Reefs in  
thermally variable water bodies bleach less extensively than reefs in thermally constant environments  
66 (Sully et al. 2019). Thus, a relatively large body of literature exists to describe how ecosystem  
sensitivity to extreme climatic stress varies with either abiotic or biotic variables. In comparison, the  
68 abiotic and biotic processes that accelerate or inhibit restoration of ecosystem function after climate  
stress remain poorly understood. The consequences of extreme stress can persist for some time  
70 following perturbation (*i.e.* legacy effects; Smith 2011, Sala et al. 2012, Anderegg et al. 2015), but few  
multi-site studies have assessed the climatic and biological determinants of ecosystem recovery.  
72 Furthermore, it is difficult to infer general patterns and mechanisms regarding differential ecosystem  
sensitivity to and recovery from climate stress because there is no standardized vocabulary describing  
74 ecosystem responses to stress, and current quantitative method for estimating ecosystem trajectories  
during and after stress suffer from significant statistical problems.

76 Consider the issue of estimating resistance/sensitivity of terrestrial primary production to  
drought. The first problem is the lack of a consistent method for describing the decline in primary  
78 production; resistance and sensitivity are antonyms for the same phenomenon with at least five  
common mathematical formulations (Table 1). The second problem is that comparing  
80 sensitivity/resistance estimates among sites or years is difficult even when using a single metric. For  
example, estimating sensitivity/resistance as the ratio of production during a drought year to production  
82 during the previous year (Table 1) biases estimates of sensitivity/resistance if the year prior to drought  
was below or above average rainfall. That is, the context of the drought varies from site to site and year  
84 to year, impairing inter-site or even intra-site comparisons of drought sensitivity. This ratio also  
includes observation error within its estimate; low or high estimates of primary production during  
86 either the previous year or the drought year partly arise from imperfect sampling methods, such that we

cannot know the extent to which the ratio represents the true process of resistance or incorporates  
88 sampling artifacts. Finally, it is difficult to place estimates of sensitivity into a climate context because  
the degree of stress induced by a given rainfall reduction varies among grasslands. That is, a 200mm  
90 reduction in annual rainfall imposes a much stronger meteorological drought in the arid shortgrass  
steppe than it does in mesic tallgrass prairies (Knapp et al. 2015b). Thus, there is a need for an estimate  
92 of sensitivity/resistance that is free of observation error, not biased by stochasticity in production or  
rainfall, and standardizes stress magnitude among many disparate ecosystems relative to normal  
94 interannual variability.

Quantifying ecosystem resilience/recovery/legacy effects to climate stress has proven no less  
96 idiosyncratic (Table 1), and many of the same statistical artifacts described above afflict widely used  
estimates of resilience/recovery. As before, estimating ecosystem resilience using the proportion  
98 reduction in primary production after drought compared to primary production before drought  
incorporates both temporal stochasticity and observation error. Resilience to drought might, for  
100 example, be overestimated if the post-drought year is abnormally wet or the pre-drought year was  
abnormally dry, or if observation error resulted in higher measurements of primary production post-  
102 drought simply due to sampling protocols. Perhaps the most popular method for quantifying  
resilience/legacy effects of primary production is to calculate the predicted primary production for  
104 every year using a temporal primary production-precipitation regression based on inter-annual time  
series data (Sala et al. 2012, Anderegg et al. 2015). The error of the post-drought year, observed –  
106 predicted, constitutes the legacy effect. To demonstrate, the shortgrass steppe of Colorado experienced  
an extreme drought in 2012 (Fig. 1A – red dot). Based on the primary production-precipitation  
108 relationship, we can estimate the predicted value of primary production in 2013 (Fig. 1B). The legacy  
effect of drought is then the observed primary production (Figs. 1A,B – green dot) minus the predicted  
110 primary production in 2013 (Fig. 1B).

However, this estimation method suffers from several logical and statistical issues. First, observations will almost never fall exactly along the regression line; by definition half of the points will be above and half will be below the line. Second, the distance from the regression line that we consider to be a significant ‘legacy’ effect depends generally on sample size and less on any biological property. Third, this method assumes that scatter surrounding the primary production-precipitation relationship is entirely caused by legacy effects. Is this true for all points, or only for the one point in which the ecologist is interested? If legacy effects are the only cause of scatter, then incorporating legacy effects into regression models should perfectly model data. Though autoregressive parameters sometimes do improve fit, they do not model data perfectly nor do they substantially improve prediction accuracy for a single observation (Oesterheld et al. 2001). If legacy effects apply only to the year following an extreme event, do sources of variability present in other years not occur in post-stress years, such that legacy effects explain the entirety of deviation from the mean in the post-stress year? In reality, many factors likely contribute to an imperfect primary production-precipitation relationship in all years, including the within-year distribution of rainfall event size and timing (Heisler-White et al. 2008), observation error, stochasticity in community composition, and potential legacy effects. Sites with a weaker primary production-precipitation relationship (*i.e.* lower  $R^2$ ) will have more scatter about the line and therefore possess stronger “legacy effects”. There is currently no way to parse out whether legacy effects calculated in this manner arise from true legacy effects, observation error, or how the legacy effect depends on the actual weather patterns during the recovery year.

To impose statistical rigor in testing for legacy effects, some studies compared the observed point to the 95% CI of the predicted value and report only legacy effects that are significantly different from the mean (Griffin-Nolan et al. 2018) (Table 1; Fig. 1B - orange shaded area). However, this too has statistical issues. First, as above, the presence of a point inside or outside the mean CI might be observation error. Second, the significance of a legacy effect depends on the width of the mean 95% CI,

which is at least partially determined by sample size. For long time series, over 80% of observations  
136 would be considered significant legacy effects when compared to the mean CI, even when data were  
generated without legacies (Fig. 1C). In other words, sites with longer time series (*i.e.* more data) are  
138 more likely to show significant “legacy effects” even when no legacy effects are present because the  
width of the 95% CI shrinks proportionally to the inverse square-root of sample size. Comparing the  
140 presence of legacy effects among sites might simply be comparing differences in time series length. In  
the shortgrass steppe, the point for 2013 would be a ‘significant’ legacy effect even though it falls well  
142 within the 95% envelope for individual data points (Fig. 1B). To test whether legacy effects fall outside  
the normal range of variability, it is more appropriate to compare the observed ‘legacy effect’ point to  
144 the observation/prediction interval. Using the observation confidence interval, instead of the mean  
confidence interval, alleviates this particular issue by minimizing false legacy effects because the width  
146 of the observation interval depends only on residual error, not sample size (*i.e.* Type I error for  
simulations, Fig. 1C). This issue raises the possibility that many reported legacy effects might be noise,  
148 and ecosystem ecologists currently have no statistical method that can reliably separate legacy effects  
from observation error.

150 Here, I propose a statistical framework that estimates all three components of ecosystem  
response to stress using standardized language (resistance, resilience, recovery, and legacy effects)  
152 while resolving all of the issues described above. Coupling autoregressive time series with exogenous  
predictors (ARX) models with impulse response functions (IRFs) allows researchers to statistically  
154 subject all ecosystems to similar levels of stress, estimate legacy effects, and obtain a standardized  
estimate of ecosystem resistance and resilience to drought free from observation error and stochastic  
156 processes inherent in raw data. This method will enable researchers to rigorously compare resistance  
and resilience among locations using long-term time series, thereby improving our knowledge of  
158 ecosystem responses to extreme stress.

## 160 **Impulse Response Functions**

Impulse response functions derive from time series analyses (*e.g.* autoregressive and/or  
162 moving average models) and describe the trajectory of dynamic systems following stress. They are  
particularly useful in systems that are logistically difficult, costly, or impossible to manipulate  
164 experimentally, such as financial markets. Indeed, econometricians have widely implemented IRFs to  
understand the resistance, resilience, and recovery of financial markets to instantaneous “shocks”  
166 (Creal and Wu 2017, Gambetti and Musso 2017). For example, Senbet (2016) used IRFs to visualize  
the consequences of higher federal interest rates on unemployment, consumption, and other indicators  
168 of economic health. In medical studies, IRFs describe how the human body responds to pulsed stress  
events, such as elevated or depressed hormone activity (Schultz et al. 2015, Chang et al. 2017). Earth  
170 system modelers use IRFs to understand how global temperature or CO<sub>2</sub> concentrations respond to  
various shocks, such as changes in oceanographic processes or vehicular emissions (Thompson and  
172 Randerson 1999, Joos et al. 2013, Millar et al. 2017, Zeng et al. 2017). However, no ecological study  
has yet used IRFs to quantify ecosystem resistance to and recovery from extreme stress events.  
174 Fortunately, calculating IRFs is as simple as fitting autoregressive models using standard time series  
methods readily available in many programming languages (*e.g.* the *arimax* function in the TSA library  
176 of R), comparing models to determine the appropriate autoregressive order, and then calculating the  
components of ecosystem stress response using simple combinations of parameters from the best  
178 model. The ease of IRF calculation could facilitate widespread adoption in assessing ecosystem  
responses to extreme stress across a variety of study systems.

180 Constructing IRFs first requires fitting various ARX( $p$ ) models to long-term time series data to  
identify whether legacy effects are present. ARX( $p$ ) models modify autoregressive models of order  $p$   
182 (*i.e.* AR( $p$ ) models) by including one or more exogenous variables:



$$y_t = \beta x_t + \varphi_1 y_{t-1} + \varphi_2 y_{t-2} + \dots + \varphi_p y_{t-p} + \varepsilon_t$$

184 This model states that ecosystem state at time  $t$  ( $y_t$ ) depends on current exogenous values ( $x_t$ , *e.g.* annual precipitation, sea-surface temperature anomaly, etc.), previous ecosystem states up to  $p$  time steps in  
186 the past ( $y_{t-p}$ , *i.e.* legacy effects), and error from both unmeasured processes and sampling issues ( $\varepsilon_t$ ). The appropriate order  $p$  can be chosen via information theoretic methods (*e.g.* AIC, BIC) or via chi-square likelihood ratio tests comparing successively lower orders (*e.g.* AR(2) vs. AR(1), AR(1) vs. AR(0), etc). The lowest order model, ARX(0), is simply a linear regression of ecosystem state against  
188 the exogenous variable with no intercept if the response data have been standardized prior to regression (the intercept is the mean, and standardization of the response makes the mean equal to 0). Both  $y$  and  
190  $x$  should be standardized to a mean of 0 and standard deviation of 1, especially if the objective is to compare stress resistance and resilience among different study sites or ecosystems.

194 Once the appropriate ARX( $p$ ) model has been identified, the next step is to derive the IRF. IRFs use the fitted ARX( $p$ ) model to predict ecosystem state under new values of  $x$  through time. The  
196 special case of imposing an initial stress to the exogenous variable (*e.g.* drought or heat wave) then allowing the exogenous variable to return to nominal levels for recovery is represented by:

$$198 \quad x^* = [\alpha, 0, 0, 0, 0, 0, 0, 0, 0, 0]$$

where  $\alpha$  denotes the level of stress at the initial time point. It is critically important that  $x$  be  
200 standardized prior to model fitting, thus a value of  $x^*_t = 0$  represents average exogenous conditions (*i.e.* average precipitation) and  $\alpha$  is stress in units of standard deviations for the exogenous predictor. In this  
202 way, ecologists can statistically subject disparate ecosystems to the same level of relative stress (*e.g.* a  $2\sigma$  decline in precipitation) and allow the system to return to nominal values when estimating  
204 ecosystem resistance and resilience to stress, thereby eliminating stochasticity and observation error present in current methods.

206 After determining the appropriate value for  $\alpha$ , the IRF for ecosystem state ( $y^*$ ) can be  
calculated either recursively or, in the case of the simple  $x^*$  used here, analytically. Ecologists can then  
208 use the IRF to quantify various components of ecosystem response to stress. In the context of IRFs,  
stress responses can be defined as:

210 1. **Resistance** – The standardized decline in ecosystem state when subjected to an initial stress of  $\alpha$  in  
the exogenous variable at  $t = 0$ . More negative values imply lower resistance. For example, stronger  
212 drought-induced declines in primary production, or bleaching-induced reductions in coral cover, yield  
more negative resistance values. Units are in standard deviations of the ecosystem state, provided that  $y$   
214 has been appropriately standardized beforehand.

2. **Resilience** – The standardized decline in ecosystem state in the time step immediately following an  
216 initial stress of  $\alpha$  in the exogenous variable. More negative values imply lower resilience. Positive  
values indicate positive legacy effects. Such situations occur when, for example, drought causes a  
218 buildup of soil nitrogen that can stimulate plant growth when rainfall returns to normal levels the  
following year (Hofer et al. 2017). Units are in standard deviations of the ecosystem state, provided  
220 that  $y$  was appropriately standardized beforehand.

3. **Recovery** – The amount of time required for the ecosystem state to recover to half of its resistance  
222 value. In other words, how much time is required for the ecosystem state to regain a given percentage  
of the decline experienced during stress. Larger values imply slower recovery. Units are in time steps  $t$   
224 (*i.e.* years for annual primary production). Note that I in this paper, I chose 50% recovery arbitrarily  
and ecologists could modify this value depending on the question or system under study.

226 For the simplified  $x^*$  listed above, each quantity has analytical solutions for ARX( $p$ ) models of different  
orders (Table 2).

228

*ARX(0) Models*

230 The ARX(0) model is a simply linear regression of standardized ecosystem state against a  
standardized exogenous variable. The IRF is given by:

$$232 \quad y^*_t = \beta x^*_t$$

Resistance to the initial stress at  $t^* = 0$  is then:

$$234 \quad y^*_0 = \beta x^*_0 = \beta \alpha$$

In this model, there are no ecosystem resilience or recovery values because the ecosystem recovers  
236 immediately and perfectly in the absence of legacy effects. That is, the ecosystem state returns to  
average conditions following the return of the exogenous value to average conditions:

$$238 \quad y^*_1 = \beta x^*_1 = 0$$

#### 240 *ARX(1) Models*

ARX models with one lag effect are given by the equation:

$$242 \quad y_t = \beta x_t + \phi_1 y_{t-1} + \varepsilon_t$$

In this case, the IRF can be calculated via recursive substitution:

$$244 \quad y^*_t = \phi^t_1 \beta \alpha$$

Assuming that the ecosystem state was at average conditions prior to stress ( $y^*_{-1} = 0$ ) this gives  
246 ecosystem resistance as:

$$y^*_0 = \beta \alpha$$

248 Resilience is ecosystem state at the next time step:

$$y^*_1 = \phi_1 \beta \alpha$$

250 Recovery is the time required to achieve a 50% return to nominal levels:

$$t = \log(0.5) / \log(\phi_1)$$

252

#### *ARX(2) Models*

254 ARX(2) models include two lagged time steps:

$$y_t = \beta x_t + \phi_1 y_{t-1} + \phi_2 y_{t-2} + \dots + \phi_p y_{t-p} + \varepsilon_t$$

256 General solutions require linear algebra. The equation above can be placed into matrix algebra form as:

$$y_t = \Psi y_{t-1} + x_0 \beta$$

258 
$$\begin{bmatrix} y_{t-1} \\ y_t \end{bmatrix} = \begin{bmatrix} 0 & 1 \\ \psi_2 & \psi_1 \end{bmatrix} \begin{bmatrix} y_{t-2} \\ y_{t-1} \end{bmatrix} + \begin{bmatrix} 0 \\ \alpha \end{bmatrix} \beta$$

which, when expanded, yields the two equations:

260 
$$\begin{bmatrix} y_{t-1} \\ y_t \end{bmatrix} = \begin{bmatrix} y_{t-1} \\ \psi_2 y_{t-2} + \psi_1 y_{t-1} + \beta \alpha \end{bmatrix}$$

Assuming that both the ecosystem state and exogenous values were at average conditions prior to the stress (i.e.  $y_{-2}^* = y_{-1}^* = 0$ ), then resistance is given by:

$$y_0 = x_0 \beta$$

264 However, because this is a vector of length 2, resistance at  $t = 0$  is actually the second element of the vector:

266 
$$(x_0 \beta)_2$$

Recursive substitution yields the value for resilience at  $t = 1$ :

268 
$$y_1 = (\Psi x_0 \beta)_2$$

where again the subscript denotes the second element of the vector. More generally, the IRF has the form:

$$(y_t)_2 = (\Psi^t x_0 \beta)_2$$

272 Importantly,  $\Psi^t$  is the matrix power of  $t^l$ . Recovery cannot be calculated analytically because ARX(2) models exhibit oscillations, and there may be more than one time point where  $y_t^* = 0.5 y_0^*$ . As a result, recovery is best quantified as the first time point where  $y_t^*$  is closest to 0.5:

<sup>1</sup> Care must be taken for matrix powers in many programming languages. In R, typing `psi^2` simply squares every element of `psi` and is not the same as `psi %*% psi`, which is the matrix square of `psi`. In Python, the square of a matrix is calculated using the `matrix_power` function in the `numpy.linalg` module.

$$\operatorname{argmin}_i [ |(\Psi' \beta x_0)_2 - 0.5(\beta x_0)_2| ]_1$$

276 where the subscript 1 denotes the first element of the set in the event that multiple points satisfy the  
condition within the brackets. The interior of the brackets denotes the absolute value of the difference  
278 between the IRF and half of resistance.

## 280 **Resistance and resilience of a cool-season grassland to drought**

The simplicity of IRFs can be demonstrated with an example application. I estimated the  
282 resistance, resilience, and recovery of aboveground net primary production (ANPP) in a northern, cool-  
grass prairie to extreme drought using primary production and precipitation data from Manyberries,  
284 Alberta (Smoliak 1986) (Figure 2). Prior to analyses, both ANPP and precipitation were examined for  
gap years ( $n = 4$  non-sequential gap years). Because ARX models cannot work with missing years, I  
286 first interpolated the four missing production and precipitation values using a radial basis function.  
After standardizing ANPP and precipitation as described above, I detrended both time series by  
288 calculating the residuals of each time series regressed against time to ensure weak stationarity required  
by autoregressive models. I then calculated resistance and resilience following the methods in Table 1.  
290 Next, I used IRFs to estimate resistance, resilience, and recovery. To do so, I fit ARX(0), ARX(1), and  
ARX(2) models to the dataset using dedicated time series methods (the ARIMAX function in the  
292 *statsmodels.tsa* Python module). After model fitting, I identified the best-fitting model using Bayesian  
Information Criteria (BIC). I chose BIC because BIC penalizes additional terms more heavily than AIC  
294 and is therefore more conservative.

Primary production at Manyberries was highly contingent on annual precipitation (Figure 2A).  
296 Using Method 1 (see Table 1), the slope of the primary production – precipitation relationship provides  
an estimate of  $0.14 \pm 0.02$  g ANPP per mm ppt. However, calculating sensitivity following Method 2  
298 provides an estimate of 0.10 g ANPP per mm ppt, significantly lower than the estimate of sensitivity

from Method 1 ( $p = 0.046$ ). I then estimated drought resistance using Methods 3 and 4 for every year in  
300 which precipitation fell beneath the 5% quantile (standardized precipitation  $< -1.64$ ). In Manyberries,  
only the year 1973 met this criteria. According to Method 3, during 1973 Manyberries experienced a  
302 51% decline in ANPP relative to the long-term mean. However, using percent change from the previous  
year provided only a 36% decline in ANPP, despite the previous year possessing near average  
304 precipitation (standardized precipitation for 1972 =  $-0.26$ ). This highlights the influence of potential  
observation error; the preceding year with average precipitation had below average ANPP due to either  
306 process or observation errors, but it is impossible to know how severely those errors biased sensitivity  
estimates. Thus, each method outlined in Table 1 provides significantly different, sometimes vastly so,  
308 estimates of drought sensitivity at Manyberries AB, and often on different, non-comparable scales.  
Furthermore, these methods cannot disentangle observation error from process error, nor incorporate  
310 potential legacy effects that might affect the prior year's ANPP.

IRFs can rectify these issues by using ARX models. For example, BIC model selection  
312 identified clear legacy effects (Table 3). Because both one and two-year lags were equally plausible  
(Table 3), I chose the ARX(1) model as the most parsimonious fit to the data. Positive autocorrelation  
314 ( $\phi_1 = 0.42 \pm 0.09$ ) suggests that extremely low ANPP in a given year would be followed by lower than  
expected ANPP the next, such that drought might negatively impact ANPP for several years after the  
316 initial event. To visually and empirically quantify ecosystem responses to drought, I calculated the IRF,  
resistance, resilience, and recovery time of ANPP after a  $2\sigma$  decline in rainfall (Fig. 2B). A  $2\sigma$  drought  
318 resulted in a  $1.2\sigma$  decline in ANPP, and strong legacy effects inhibited complete recovery for  
approximately 7 years (Fig. 2B). However, Manyberries production was quite resilient, having  
320 recovered 50% of its function in 0.80 years, such that the year following drought saw only a  $0.51\sigma$   
decline in ANPP (Figure 2B).

## Climate constraints on grassland resistance and resilience to drought

324 By standardizing both the severity of stress and ecosystem response, IRFs can be used to  
compare ecosystem resistance and resilience across sites of differing biotic and abiotic contexts. For  
326 example, ecologists commonly use long term time series data to assess how grasslands vary in drought  
resistance and resilience across global or continental climate gradients (Sala et al. 2012, Knapp et al.  
328 2015a). However, previous efforts have been, quite understandably, hindered by the difficulties in  
standardizing drought effects across sites and accurately quantifying drought resistance free from  
330 temporal stochasticity. Here, I used IRFs to calculate ecosystem resistance, resilience, and recovery of  
14 globally distributed herbaceous sites previously identified to possess significant legacy effects.

332 Using (Sala et al. 2012), I identified 14 datasets composed of both annual precipitation and  
aboveground primary production in herbaceous communities. Gap years in either primary production  
334 or precipitation were filled using a radial basis function. Ideally, time series would contain at least  
thirty consecutive years of data. Unfortunately, very few ecological datasets span that duration. I  
336 therefore kept datasets with ten or more years. Prior to analyses, I gap-filled, standardized, and  
detrended each dataset as was done for Manyberries, AB (see above). To illustrate the disparity among  
338 existing methods for estimating ecosystem stress resistance, I calculated resistance for each dataset  
using two ‘slope-based’ methods (Methods 1 and 2, Table 1) and two ‘percent-based’ methods  
340 (Methods 3 and 4, Table 1). I then used BIC to distinguish between ARX(0), ARX(1), and ARX(2)  
models. After identifying the appropriate autoregressive order, I calculated IRFs, resistance, resilience,  
342 and recovery following a  $2\sigma$  decline in precipitation. In this way, ecosystem resistance, resilience, and  
recovery were all derived for the same magnitude of rainfall reduction relative to ambient conditions at  
344 each site. To assess climate constraints on ecosystem resistance, resilience, and recovery from drought,  
I regressed each metric against mean annual precipitation derived from WorldClim.

346 The four resistance methods gave quantitatively different results. The two ‘slope-based’  
methods were poorly correlated ( $r = 0.24$ ), largely due to the presence of one outlier from Method 2  
348 (Fig. 3A). The outlier exemplifies the danger of Method 2, representing a site with a large change in  
ANPP but little change in precipitation between pre-drought to drought years. The degree to which this  
350 point is influenced simply by observation error between years is unknown. The remaining points were  
scattered around the 1:1 line but, importantly, the order of sites differed between Methods 1 and 2 (Fig.  
352 3A). The least sensitive site identified by Method 1 was only the fourth least resistant site in Method 2,  
while the most sensitive site according to Method 1 was only the fifth most sensitive site according to  
354 Method 2 (Fig. 3A). Re-ordering issues were less severe between the two ‘percent-based’ methods,  
largely due to the higher degree of correlation between Methods 3 and 4 ( $r = 0.83$ , Fig. 3B). However,  
356 comparing across ‘slope-based’ and ‘percent-based’ methods yielded much weaker correlation among  
sensitivity estimates (Methods 1 vs. 3:  $r = 0.47$ , Fig. 3C; Methods 1 vs. 4:  $r = -0.42$ , Fig. 3D) and, as a  
358 result, strong reordering of sites. For example, the most sensitive site identified by Method 1 was the  
fourth-most sensitive site in Method 3, while the most sensitive site in Method 3 was ninth-most  
360 sensitive site in Method 1. Thus, there is a strong need for a method of estimating sensitivity that is  
applied consistently across studies to facilitate comparisons across different time series.

362 Using the IRF method revealed that primary production at the majority of sites (71%) was best  
described by an ARX(0) model, indicative of no legacy effects (Table 4). Of the four sites exhibiting  
364 significant lag effects, three were best fit by an ARX(1) model while only one site was best described  
by an ARX(2) model (Table 4). Resistance to a  $2\sigma$  decline in precipitation varied among sites from a  
366 minimum of -2.0 SD decrease in ANPP at XLN to a maximum of 0.5 SD increase in ANPP at NRB  
(Figure 3A). Indeed, a significant positive relationship between drought resistance and mean annual  
368 precipitation ( $p = 0.008$ ) indicated that drier herbaceous sites were generally less resistant than mesic  
systems. Yet the relationship was not strong ( $R^2 = 0.41$ ); even dry sites varied significantly in drought



370 resistance. For example, JRN possesses roughly the same mean annual precipitation as XLN, yet JRN  
was 68% more resistant to a  $2\sigma$  reduction in rainfall than XLN (Fig. 3A). Such variability in drought  
372 resistance among sites of similar precipitation has been previously reported (Huxman et al. 2004) and  
could derive from differences in species composition, rainfall patterns (*e.g.* monsoonal, Mediterranean,  
374 etc.), or management history among sites. Relatively few sites demonstrated lag effects, such that most  
sites did not exhibit either resilience or recovery (Fig. 3B,C). There was no relationship between mean  
376 annual precipitation and either the strength of resilience/recovery or the probability of a legacy effect  
(Fig. 3B,C).

378

## Discussion

380 Given the expected increase in both the severity and intensity of extreme stress events as  
climate change progresses, it is imperative that we accurately quantify how ecosystems respond to  
382 stress. Estimating ecosystem vulnerability to stress using long-term time series data is a promising  
approach, but ecologists have not yet coupled time series data with the appropriate statistical tools.  
384 Most current methods possess flaws that potentially bias estimates of ecosystem susceptibility to stress  
and potentially misidentify legacy effects. To resolve these issues, I advocate for using IRFs derived  
386 from autoregressive time series models as a single quantitative framework that can accurately estimate  
ecosystem resistance, resilience, and recovery from severe stress events. Impulse response functions  
388 have numerous advantages over prior techniques, including the separation of observation and process  
errors, standardizing drought intensity among different locations, and rigorously testing for legacy  
390 effects.

Legacy effects have previously been suggested to be widespread among terrestrial ecosystems  
392 (Sala et al. 2012). However, evidence for legacy effects is mixed. Previous studies using the same  
datasets here reported significant autocorrelation of primary production in only six grasslands (at a

394 significance threshold of  $p = 0.1$ , Sala et al. 2012), while the information theoretic approach advocated  
here identified significant autocorrelation in only four grasslands, albeit at a stronger threshold for  
396 significance. These qualitatively similar patterns suggest that legacy effects may be rare. This is not to  
say that legacy effects do not occur; controlled experiments identified strong drought legacies in the  
398 Patagonian steppe of southern Argentina (Yahdjian and Sala 2006). Experiments have even  
demonstrated positive legacy effects of drought in herbaceous communities of Europe (Hofer et al.  
400 2017). Instead, it appears that grassland systems dominated by fast-growing, perennial, herbaceous  
species tend to be highly resilient and recover quickly from stress (Stuart-Haëntjens et al. 2018), such  
402 that drought legacies in grasslands might not be widespread. In contrast, forests are dominated by slow-  
growing, woody trees and shrubs and are often much less resilient to drought than grasslands (Stuart-  
404 Haëntjens et al. 2018). It is therefore plausible that legacy effects are much more common in forests  
than in grasslands (Anderegg et al. 2015). Testing this hypothesis using the statistical framework  
406 proposed here represents an interesting direction of future research.

The method proposed here also yields results consistent with previous studies regarding  
408 regional and global patterns in grassland resistance to drought. Multiple experimental and observational  
studies reported that arid and semi-arid grasslands are most sensitive to drought stress (Huxman et al.  
410 2004, Knapp et al. 2015a). Likewise, the  $2\sigma$  reduction in rainfall tested here provided the same result;  
semi-arid grasslands experience stronger reductions in primary production relative to normal inter-  
412 annual variation than did mesic grasslands. However, patterns in resilience across climates reported  
here did differ from previous work. Stuart-Haëntjens et al. (2018) reported strong regional variation in  
414 grassland resilience to drought; semi-arid grasslands were significantly less resilient to drought than  
were mesic grasslands. In contrast, the IRF method identified relatively few instances of legacy effects,  
416 such that most grasslands were recovered immediately following stress and there was no clear trend  
with climate. Inconsistencies between the results of this study and Stuart-Haenjens et al. (2018) likely

418 arise from key differences in the underlying data; this study used long-term, observational time series  
to calculate resilience, whereas Stuart-Haenjens et al. (2018) compiled data from experimental  
420 droughts. Applying the IRF method to more grassland sites, consisting of longer time series, could  
prove fruitful in assessing abiotic constraints on ecosystem resilience to drought.

422 One advantage of the method proposed here is the relative ease with which ARX models can  
be fit and IRFs calculated in common statistical programming languages. The following  
424 recommendations would prove beneficial for ecologists wishing to implement the method outlined  
here:

426 1. *Properly pre-treat data* – Data must be processed properly prior to analysis with autoregressive  
models. First, data must be examined for gaps, as simple ARX models proposed here do not function  
428 with non-contiguous data. Small gaps can be filled with a data imputation function (*e.g.* radial basis  
functions, used here). Second, data must be detrended. ARX models assume stationarity, wherein the  
430 mean and variance do not change through time. Detrending data can stabilize the mean through time,  
but variances must still be checked visually. Third, data should be standardized in order to facilitate  
432 comparison among sites. For example, if precipitation is not standardized, then  $\alpha = -2$  for the IRF is  
only a 2mm decline in rainfall, rather than an extreme  $2\sigma$  event.

434 2. *Use a  $2\sigma$  increase or decrease in the exogenous stressor* – If all ecologists use a  $2\sigma$  change in the  
exogenous stressor, then results are perfectly comparable among studies. I chose  $2\sigma$  because it  
436 represents an extreme event. For example, a  $1\sigma$  decline in rainfall is the 16% quantile, whereas a  $2\sigma$   
decline in rainfall represents a drought falling in the 2% quantile (assuming a normal distribution),  
438 thereby representing an extreme stress event.

3. *Report the autoregressive order and parameter values* – Reporting the parameters enables future  
440 researchers to easily extract the IRF and calculate ecosystem stress responses under different  $x^*$ . For  
example, ecologists could standardize all IRFs to a  $2\sigma$  stress if variation exists in the literature, or could

442 assess ecosystem recovery using values different from a 50% return in ecosystem function.

Alternatively, future researchers could use IRFs to assess how systems respond to multiple stress events  
444 of either identical or varying magnitude.

4. *Use designated AR model fitting functions* – The ARX functions specified here could all be fit using  
446 least squares. Doing so, however, requires trimming the first two data points from all model fits  
because we cannot use information theory or likelihood ratio tests to compare models fit to different  
448 datasets (*e.g.*  $n$  points for ARX(0),  $n-1$  points for ARX(1),  $n-2$  points for ARX(2), etc.). For small  
datasets, the loss of two data points can substantially alter the results. For example, using OLS to fit an  
450 ARX(0) model to the RMY data without the first two data points ( $n = 8$ ) results in no relationship  
between primary production and precipitation ( $p = 0.65$ ) because the first two data points are the driest  
452 and wettest years. Using the full dataset ( $n = 10$ ) yields a stronger primary production – precipitation  
relationship ( $p = 0.12$ ). Common statistical languages have ARIMAX functions (R: TSA library,  
454 Python: statsmodels module) wherein the user can specify the AR order, incorporate an exogenous  
predictor, and utilize the full dataset.

456 In conclusion, IRFs provide ecologists with a quick and simple means for quantifying  
ecosystem responses to extreme stress, while enabling ecologists to capitalize on the increased  
458 availability of long-term, observational time series data. Ecologists can use this method to quantify the  
components of ecosystem stress response in a standardized way across many sites. Site-specific  
460 information on species composition, long-term climate, rainfall patterns, or any other important  
variable can then be used to identify the abiotic and biotic factors that dictate ecosystem stress  
462 response. For example, the brief analyses presented here suggest that dry grasslands are often more  
sensitive to drought than wet grasslands, but also that our understanding of differential ecosystem  
464 sensitivity to drought remains incomplete. As a result, IRFs should greatly improve our ability to

predict how ecosystems will respond to the increased severity and frequency of extreme events in the  
466 future.

## 468 **Acknowledgments**

I would like to thank newly minted Drs. R. Griffin-Nolan and A. Hoffman for their helpful comments  
470 on drafts of this manuscript. This work was funded by an NSF DEB award (1941390) to NPL.

## 472 **References**

Anderegg, W.R. L., J.M. Kane, and L.D. Anderegg (2013) Consequences of widespread tree mortality  
474 triggered by drought and temperature stress. *Nature Climate Change* 3:30.

Anderegg, W. R. L., C. Schwalm, F. Biondi, J. J. Camarero, G. W. Koch, M. E. Litvak, K. Ogle, J. D.  
476 Shaw, E. Shevliakova, A. P. Williams, A. Wolf, E. Ziacco, and S. Pacala. 2015. Pervasive drought  
legacies in forest ecosystems and their implications for carbon cycle models. *Science* 349:528–  
478 532.

Chang, R. W., C. Y. Chang, L. C. Lai, M. S. Wu, T. H. Young, Y. S. Chen, C. H. Wang, and K. C.  
480 Chang. 2017. Determining arterial wave transit time from a single aortic pressure pulse in rats:  
vascular impulse response analysis. *Scientific Reports* 7:1–9.

Ciais, P., M. Reichstein, N. Viovy, A. Granier, J. Ogée, V. Allard, M. Aubinet, N. Buchmann, C.  
Bernhofer, A. Carrara, F. Chevallier, N. De Noblet, A. D. Friend, P. Friedlingstein, T. Grünwald,  
484 B. Heinesch, P. Keronen, A. Knohl, G. Krinner, D. Loustau, G. Manca, G. Matteucci, F. Miglietta,  
J. M. Ourcival, D. Papale, K. Pilegaard, S. Rambal, G. Seufert, J.-F. Soussana, M. J. Sanz, E. D.  
486 Schulze, T. Vesala, and R. Valentini. 2005. Europe-wide reduction in primary productivity caused  
by the heat and drought in 2003. *Nature* 437:529–533.

- 488 Creal, D. D., and J. C. Wu. 2017. Monetary policy uncertainty and economic fluctuations. *International Economic Review* 58:1317–1354.
- 490 Gambetti, L., and A. Musso. 2017. Loan supply shocks and the business cycle. *Journal of Applied Econometrics* 32:764–782.
- 492 Gazol, A., J. J. Camarero, W. R. L. Anderegg, and S. M. Vicente-Serrano. 2017. Impacts of droughts on the growth resilience of Northern Hemisphere forests. *Global Ecology and Biogeography* 26:166–  
494 176.
- Gazol, A., J. J. Camarero, S. M. Vicente-Serrano, R. Sánchez-Salguero, E. Gutiérrez, M. de Luis, G.  
496 Sangüesa-Barreda, K. Novak, V. Rozas, P. A. Tíscar, J. C. Linares, N. Martín-Hernández, E. Martínez del Castillo, M. Ribas, I. García-González, F. Silla, A. Camisón, M. Génova, J. M. Olano, L. A. Longares, A. Hevia, M. Tomás-Burguera, and J. D. Galván. 2018. Forest resilience to drought varies across biomes. *Global Change Biology* 24:2143–2158.
- 500 Griffin-Nolan, R. J., C. J. W. Carroll, E. M. Denton, M. K. Johnston, S. L. Collins, M. D. Smith, and A. K. Knapp. 2018. Legacy effects of a regional drought on aboveground net primary production in  
502 six central US grasslands. *Plant Ecology* 219:505–515.
- Heisler-White, J., A. K. Knapp, and E. F. Kelly. 2008. Increasing precipitation event size increases  
504 aboveground net primary productivity in a semi-arid grassland steppe. *Oecologia* 158:129-140.
- Hofer, D., M. Suter, N. Buchmann, and A. Lüscher. 2017. Nitrogen status of functionally different  
506 forage species explains resistance to severe drought and post-drought overcompensation. *Agriculture, Ecosystems and Environment* 236:312-322.
- 508 Hoover, D. L., A. K. Knapp, and M. D. Smith. 2014. Resistance and resilience of a grassland ecosystem to climate extremes. *Ecology* 95:2646–2656.

- 510 Huxman, T. E., M. D. Smith, P. A. Fay, A. K. Knapp, M. R. Shaw, M. E. Loik, S. D. Smith, D. T.  
Tissue, J. C. Zak, J. F. Weltzin, W. T. Pockman, O. E. Sala, B. M. Haddad, J. Harte, G. W. Koch, S.  
512 Schwinning, E. E. Small, and D. G. Williams. 2004. Convergence across biomes to a common  
rain-use efficiency. *Nature* 429:651–654.
- 514 Joos, F., R. Roth, J. S. Fuglestedt, G. P. Peters, I. G. Enting, W. Von Bloh, V. Brovkin, E. J. Burke, M.  
Eby, N. R. Edwards, T. Friedrich, T. L. Frölicher, P. R. Halloran, P. B. Holden, C. Jones, T.  
516 Kleinen, F. T. Mackenzie, K. Matsumoto, M. Meinshausen, G. K. Plattner, A. Reisinger, J.  
Segschneider, G. Shaffer, M. Steinacher, K. Strassmann, K. Tanaka, A. Timmermann, and A. J.  
518 Weaver. 2013. Carbon dioxide and climate impulse response functions for the computation of  
greenhouse gas metrics: a multi-model analysis. *Atmospheric Chemistry and Physics* 13:2793–  
520 2825.
- Knapp, A. K., C. J. W. Carroll, E. M. Denton, K. J. La Pierre, S. L. Collins, and M. D. Smith. 2015a.  
522 Differential sensitivity to regional-scale drought in six central US grasslands. *Oecologia* 177:949–  
957.
- 524 Knapp, A. K., D. L. Hoover, K. R. Wilcox, M. L. Avolio, S. E. Koerner, K. J. La Pierre, M. E. Loik, Y.  
Luo, O. E. Sala, and M. D. Smith. 2015b. Characterizing differences in precipitation regimes of  
526 extreme wet and dry years: implications for climate change experiments. *Global Change Biology*  
21:2624–2633.
- 528 Lloret, F., E. G. Keeling, and A. Sala. 2011. Components of tree resilience: effects of successive low-  
growth episodes in old ponderosa pine forests. *Oikos* 120:1909–1920.

- 530 Millar, J. R., Z. R. Nicholls, P. Friedlingstein, and M. R. Allen. 2017. A modified impulse-response  
representation of the global near-surface air temperature and atmospheric concentration response  
532 to carbon dioxide emissions. *Atmospheric Chemistry and Physics* 17:7213–7228.
- Le Nohaïc, M., C. L. Ross, C. E. Cornwall, S. Comeau, R. Lowe, M. T. McCulloch, and V. Schoepf.  
534 2017. Marine heatwave causes unprecedented regional mass bleaching of thermally resistant  
corals in northwestern Australia. *Scientific Reports* 7:14999.
- 536 Oesterheld, M., J. Loreti, M. Semmartia, and O. E. Sala. 2001. Inter-annual variation in primary  
production of a semi-arid grassland related to previous-year production. *Journal of Vegetation*  
538 *Science* 12:137-142.
- Perkins, S. E., L. V Alexander, and J. R. Nairn. 2012. Increasing frequency, intensity and duration of  
540 observed global heatwaves and warm spells. *Geophysical Research Letters* 39:L20714.
- Sala, O. E., L. A. Gherardi, L. Reichmann, E. Jobbagy, and D. P. C. Peters. 2012. Legacies of  
542 precipitation fluctuations on primary production: theory and data synthesis. *Philosophical*  
*Transactions of the Royal Society B: Biological Sciences* 367:3135–3144.
- 544 Schultz, W., R. M. Carelli, and R. M. Wightman. 2015. Phasic dopamine signals: from subjective  
reward value to formal economic utility. *Current Opinion in Behavioral Sciences* 5:147–154.
- 546 Senbet, D. 2016. Measuring the channels of monetary policy transmission: a factor-augmented vector  
autoregressive (FAVAR) approach. *Journal of Central Banking Theory and Practice* 5:5–40.
- 548 Smale, D. A., T. Wernberg, E. C. J. Oliver, M. Thomsen, B. P. Harvey, S. C. Straub, M. T. Burrows, L.  
V Alexander, J. A. Benthuisen, M. G. Donat, M. Feng, A. J. Hobday, N. J. Holbrook, S. E.  
550 Perkins-Kirkpatrick, H. A. Scannell, A. Sen Gupta, B. L. Payne, and P. J. Moore. 2019. Marine



heatwaves threaten global biodiversity and the provision of ecosystem services. *Nature Climate*

552 Change IN PRESS.

Smith, M. D. 2011. The ecological role of climate extremes: current understanding and future

554 prospects. *Journal of Ecology* 99:651–655.

Smoliak, S. 1986. Influence of climatic conditions on production of *Stipa-Bouteloua* prairie over a 50-

556 year period. *Journal of Range Management* 39:100–103.

Stuart-Haëntjens, E., H. J. de Boeck, N. P. Lemoine, P. Mänd, G. Kröel-dulay, I. K. Schmidt, A.

558 Jentsch, A. Stamp, W. R. L. Anderegg, M. Bahn, J. Kreyling, T. Wohlgemuth, F. Lloret, A. T.

Classen, C. M. Gough, and M. D. Smith. 2018. Mean annual precipitation predicts primary

560 production resistance and resilience to extreme drought. *Science of the Total Environment*

636:360–366.

562 Sully, S., D. E. Burkepile, M. K. Donovan, G. Hodgson, and R. van Woesik. 2019. A global analysis of  
coral bleaching over the past two decades. *Nature Communications* 10:1264.

564 Thompson, M. V, and J. T. Randerson. 1999. Impulse response functions of terrestrial carbon cycle  
models: methods and application. *Global Change Biology* 5:371–394.

566 Wilcox, K. R., Z. Shi, L. A. Gherardi, N. P. Lemoine, S. E. Koerner, D. L. Hoover, E. Bork, K. M.

Byrne, J. F. Cahill, S. L. Collins, S. E. Evans, A. K. Gilgen, P. Holub, L. Jiang, A. K. Knapp, D. R.

568 LeCain, J. Liang, P. Garcia-Palacios, J. Peñuelas, W. T. Pockman, M. D. Smith, S. Sun, S. R.

White, L. Yahdjian, K. Zhu, and Y. Luo. 2017. Asymmetric responses of primary productivity to

570 precipitation extremes: a synthesis of grassland precipitation manipulation experiments. *Global*

*Change Biology*:4376–4385.

- 572 Yahdjian, L., and O. E. Sala. 2006. Vegetation structure constrains primary production response to  
water availability in the Patagonian Steppe. *Ecology* 87:952–962.
- 574 Zeng, S., X. Nan, C. Liu, and J. Chen. 2017. The response of the Beijing carbon emissions allowance  
price (BJC) to macroeconomic and energy price indices. *Energy Policy* 106:111–121.
- 576

| Method                                | Name           | Equation                                                      | Units                                                         | Citation                                      |
|---------------------------------------|----------------|---------------------------------------------------------------|---------------------------------------------------------------|-----------------------------------------------|
| <b><i>Reduction During Stress</i></b> |                |                                                               |                                                               |                                               |
| 1                                     | Sensitivity    | $\frac{x_t - x_{t-1}}{ppt_t - ppt_{t-1}}$                     | Change in primary production per mm chain in rainfall         | (Wilcox et al. 2017)                          |
| 2                                     | Sensitivity    | $\frac{\Delta x}{\Delta ppt}$                                 | Slope of the primary production – precipitation relationship  | (Huxman et al. 2004, Knapp et al. 2015a)      |
| 3                                     | Sensitivity    | $100 \times \left( \frac{x_t - \bar{x}}{\bar{x}} \right)$     | Percent decline from long-term mean                           | (Griffin-Nolan et al. 2018)                   |
| 4                                     | Resistance     | $\frac{x_t}{x_{t-1}}$                                         | Proportion decline from pre-drought year                      | (Lloret et al. 2011, Gazol et al. 2017, 2018) |
| 5                                     | Resistance     | $\ln \left( \frac{x_t}{x_{t-1}} \right)$                      | Log proportion decline from pre-drought year                  | (Stuart-Haëntjens et al. 2018)                |
| <b><i>Return Following Stress</i></b> |                |                                                               |                                                               |                                               |
| 6                                     | Recovery       | $\frac{x_{t+1}}{x_t}$                                         | Proportion increase in post-drought year                      | (Lloret et al. 2011, Gazol et al. 2017, 2018) |
| 7                                     | Resilience     | $\frac{x_{t+1}}{x_{t-1}}$                                     | Proportion decrease in post-drought year from pre-drought     | (Lloret et al. 2011)                          |
| 8                                     | Resilience     | $\ln \left( \frac{x_{t+1}}{x_{t-1}} \right)$                  | Log proportion decrease in post-drought year from pre-drought | (Stuart-Haëntjens et al. 2018)                |
| 9                                     | Legacy effects | $100 \times \left( \frac{x_{t_1} - \bar{x}}{\bar{x}} \right)$ | Percent decrease in post-drought year from long-term mean     | (Griffin-Nolan et al. 2018)                   |
| 10                                    | Legacy Effects | $x_{t+1} - \hat{x}_{t+1}$                                     | Observed – predicted for post-drought year                    | (Sala et al. 2012, Anderegg et al. 2015)      |

578

**Table 1.** Definitions and mathematical equations used to calculate ecosystem resistance, resilience,

580

recovery, and legacy effects following an extreme stress event.

582

| <b>Model</b> | <b>Resistanc<br/>e</b> | <b>Resilienc<br/>e</b> | <b>IRF</b>               | <b>Recovery</b>                                                       |
|--------------|------------------------|------------------------|--------------------------|-----------------------------------------------------------------------|
| ARX(0)       | $\beta\alpha$          | 0                      | $\beta x_t^*$            | 0                                                                     |
| ARX(1)       | $\beta\alpha$          | $\varphi_1\beta\alpha$ | $\varphi_1^t\beta\alpha$ | $\log(0.5) / \log(\varphi_1)$                                         |
| ARX(2)       | $(\beta x_0)_2$        | $(\Psi\beta x_0)_2$    | $(\Psi^t\beta x_0)_2$    | $\operatorname{argmin}_t[ (\Psi^t\beta x_0)_2 - 0.5(\beta x_0)_2 ]_1$ |

584

**Table 2.** Analytical equations for calculating resistance, resilience, IRF, and recovery for ARX models

586

of different orders. Note that these equations rely on the special form of  $x^*$  described in text. More complex solutions exist for general forms of  $x^*$ . The subscript  $_2$  denotes the second element of a column

588

vector (see text).

590

| <b>Model</b>  | <b>BIC</b>   | <b><math>\Delta</math>BIC</b> | <b>Parameters<br/>(mean <math>\pm</math> 1 SE)</b>                                              |
|---------------|--------------|-------------------------------|-------------------------------------------------------------------------------------------------|
| ARX(0)        | 123.4        | 14.8                          | $\beta$ : 0.65 $\pm$ 0.11                                                                       |
| <b>ARX(1)</b> | <b>108.6</b> | <b>0.0</b>                    | $\beta$ : 0.61 $\pm$ 0.09<br>$\varphi_1$ : 0.42 $\pm$ 0.09                                      |
| ARX(2)        | 109.1        | 0.5                           | $\beta$ : 0.58 $\pm$ 0.09<br>$\varphi_1$ : 0.51 $\pm$ 0.10<br>$\varphi_2$ : -0.19 $\pm$<br>0.10 |

592

**Table 3.** BIC model selection criteria for ARX(0), ARX(1), and ARX(2) models fit to primary production/precipitation data from Manyberries, AB.

594

596

| Site                         | ARX(0)     | ARX(1)     | ARX(2)     |
|------------------------------|------------|------------|------------|
| Badkhyz, Turkmenistan (BDK)  | <b>0.0</b> | 2.8        | 6.3        |
| Cheyenne, Wyoming (CHY)      | <b>0.0</b> | 2.4        | 4.3        |
| Dzhanybek, Kazakhstan (DZH)  | <b>0.0</b> | 3.0        | 6.5        |
| Jornada, New Mexico (JRN)    | <b>0.0</b> | 3.2        | 4.8        |
| Konza Prairie, Kansas (KNZ)  | <b>0.0</b> | 3.3        | 6.7        |
| Kursk, Russia (KRS)          | <b>0.0</b> | 1.3        | 3.5        |
| Manyberries, Alberta (MBR)   | 4.1        | <b>0.0</b> | 2.1        |
| Nairobi, Kenya (NRB)         | <b>0.0</b> | 0.8        | 2.6        |
| Niwot Ridge, Colorado (NWT)  | 14.0       | <b>0.0</b> | 0.4        |
| Rio Mayo, Argentina (RMY)    | <b>0.1</b> | 2.1        | 0.0        |
| Sevilleta, New Mexico (SEV)  | <b>0.0</b> | 0.9        | 1.3        |
| Fort Collins, Colorado (SGS) | <b>0.0</b> | 0.0        | 2.7        |
| Tumugi, China (TMG)          | 1.6        | <b>0.0</b> | 2.0        |
| Xilingol, China (XLN)        | 1.90       | 1.80       | <b>0.0</b> |

598

**Table 4.**  $\Delta$ BIC values of ARX(p) models for 14 grassland sites used in Sala et al. (2012). Bold denotes the best model, chosen by  $\Delta$ BIC < 2. In the case of multiple competing models ( $\Delta$ BIC < 1), I chose the simplest model following the principle of parsimony.

600

602 **Figure List**

604 **1. A)** Time series of aboveground net primary production at the shortgrass steppe near Fort Collins, Colorado. The red point denotes the drought of 2012, the green point denotes primary production in the year following drought. The orange dashed line shows predicted primary production based on the primary production – precipitation relationship. **B)** The primary production – precipitation relationship for the shortgrass steppe. The orange shaded area is the 95% CI of the mean, while the blue shaded area is the 95% CI of individual observations. Green point shows the recovery year of 2013 and how “legacy effects” are sometimes calculated (Table 1). **C)** Using the mean 95% CI (orange line) to statistically test for legacy effects results in high false positive rates as sample size increases and uncertainty about the mean decreases, while using the observation 95% CI (blue line) avoids this complication. Lines were generated by simulating 10,000 precipitation time series, then using a simulating primary production – precipitation relationship to estimate primary production in the absence of legacy effects. Type I error rates are the proportion of observations in a simulated time series that would be considered to possess significant legacy effects, despite being simulated without legacy effects.

616 **2. A)** Time series of aboveground net primary production (ANPP) at Manyberries, AB. Blue line shows the fitted ARX(1) model. Inset shows the ANPP – precipitation relationship. **B)** IRF for the ARX(1) model fitted to Manyberries, AB. Values for resistance, resilience, and recovery to a  $2\sigma$  drought were calculated following Table 2.

622 **3.** Comparison of Methods 1, 2, 3, and 4 for estimating ecosystem resistance to drought for the 14 herbaceous systems (see Table 1 for definitions). Panel **A)** compares two ‘slope-based’ methods, panel **B)** compares to ‘percent-based’ methods, while panels **C)** and **D)** compare a ‘slope-based’ method (Method 1) to both ‘percent-based’ methods. The dashed line in panels **A)** and **B)** are the 1:1 line of perfect correspondance.

626 **4.** Relationship between precipitation and A) resistance, B) resilience, and C) recovery following a  $2\sigma$   
drought for 14 herbaceous systems.

628



630

632

634

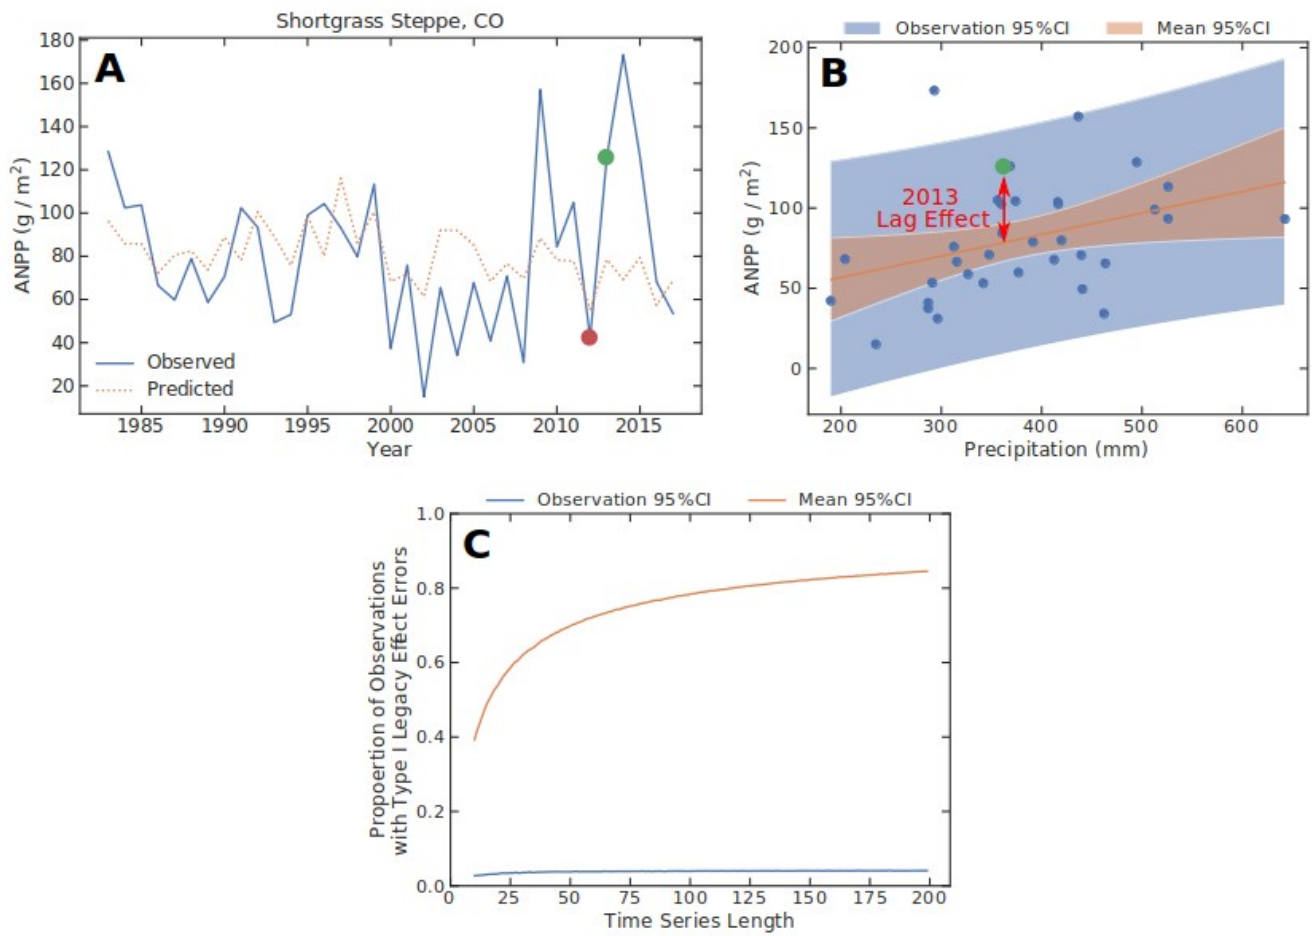

636

Figure 1

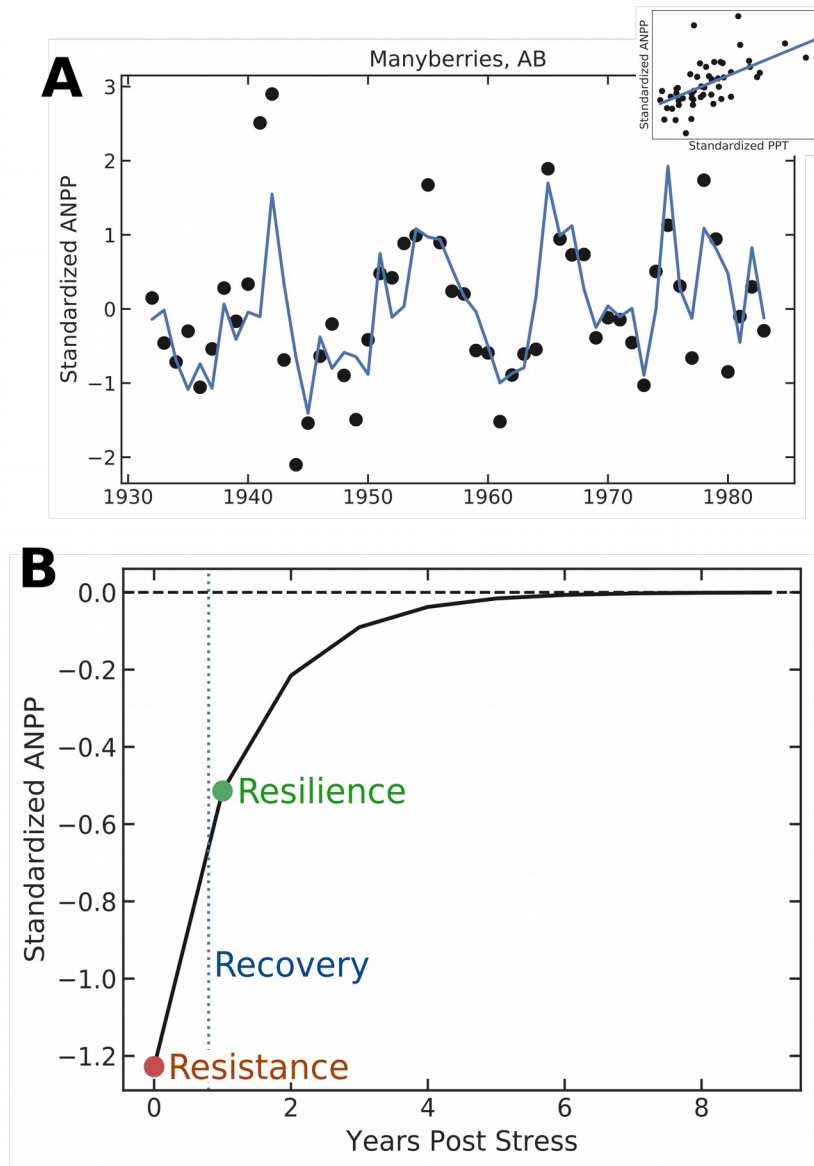

**Figure 2**

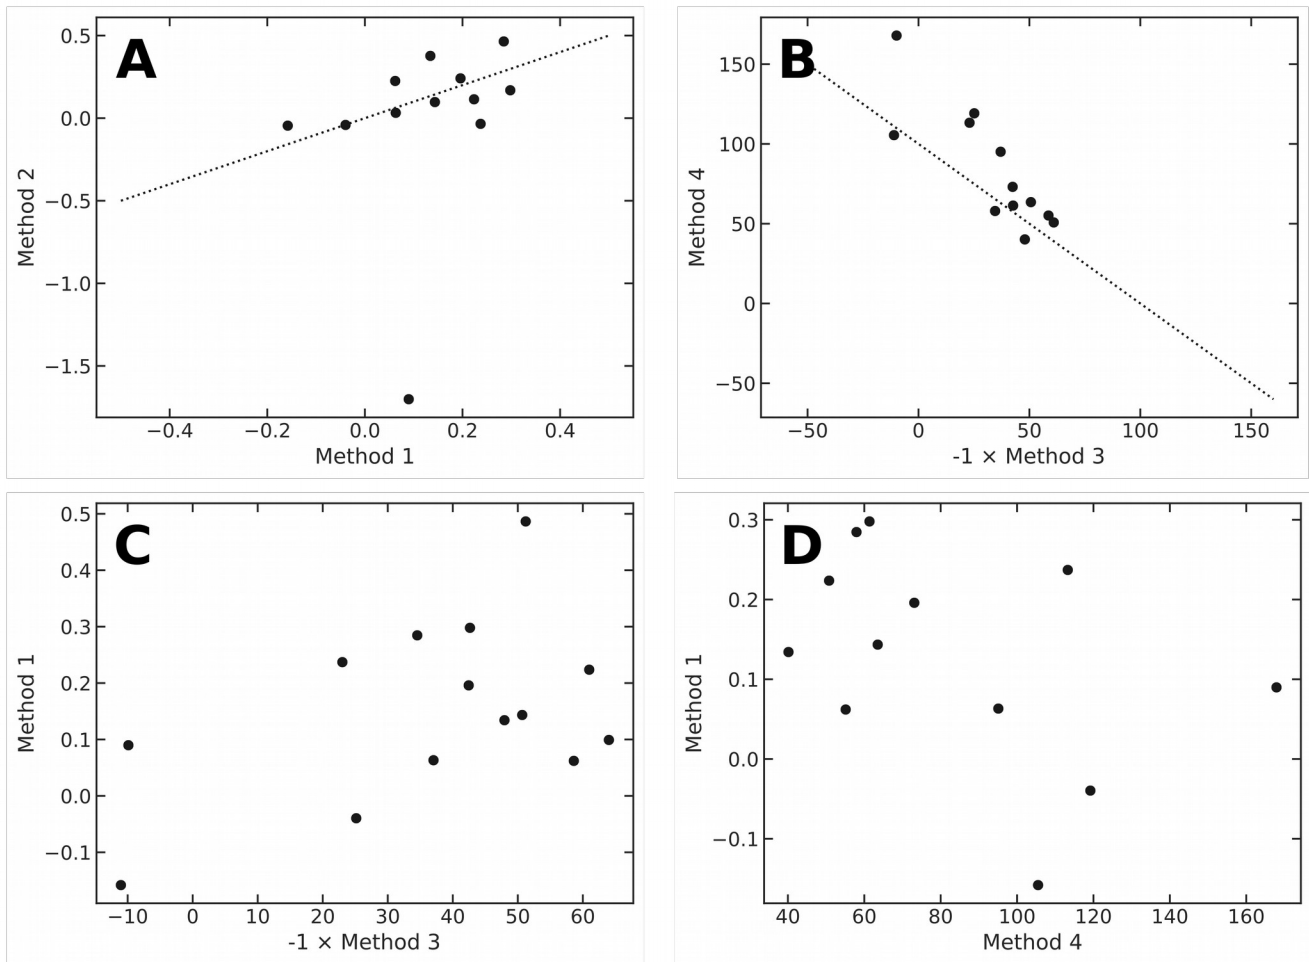

644

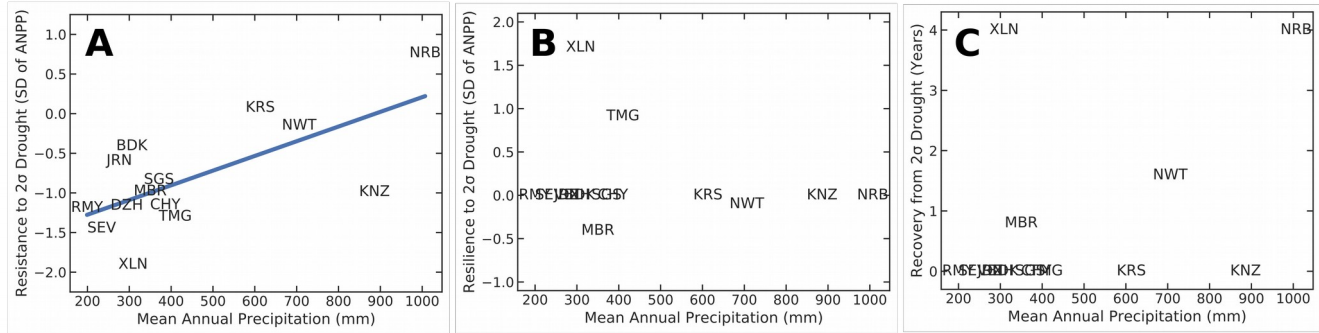

Figure 4

646

648

650

652

654

656
